# Supplementary material for: An oxidation flow reactor for simulating and accelerating secondary aerosol formation in aerosol liquid water and cloud droplets
Source: Copernicus journal article supplement (doi:10.5194/amt-17-4227-2024), 2024-07-17
Supplement: Supplementary file 1 [file amt-17-4227-2024-supplement.zip]

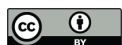

## *Supplement of*

# **An oxidation flow reactor for simulating and accelerating secondary aerosol formation in aerosol liquid water and cloud droplets**

**Ningjin Xu et al.**

*Correspondence to:* Don R. Collins (donc@ucr.edu)

- amt-17-4227-2024-supplement-title-page.pdf
- APPA\_supplement.pdf
- Supplement KinSim files.zip

The copyright of individual parts of the supplement might differ from the article licence.
